# Supplementary material for: Preparation of the copper(II) complex of the binucleating hexaaza macrocycle 2,5,8,17,20,23-hexaaza[9.9]paracyclophane and its solution chemistry, hydrolytic activity and acid dissociation kinetics ‡
Source: Royal Society of Chemistry journal article supplement (doi:10.1039/b006199i), 2001-01-01

Experimental parameters for the potentiometric study of PEA and its complexation to copper(II) is summarised in Table 1.

| **Table 1** Summary of experimental parameters for the potentiometric study of the PEA/Cu(II) system. | |  |  |
| --- | --- | --- | --- |
| Solution composition | |
| [*T*L] range/mol dm-3 |  | 7.5 x 10-4 -8.0 x 10-4 |
| [*T*Cu] range/mol dm-3 | 1.5 x 10-3 - 8.0 x 10-4 |
| *I*/mol dm-3, electrolyte | 0.1, KCl |
| pH Range | 3 - 10.5 |
| Experimental method | pH Titration, calibrated  by standard buffers |
| *T*/°C | 25 ± 0.1 |
| Total number of data points | |
| Protonation | 327 (8 curves) |
| Copper complexation | 205 (6 curves) |
| Method of Calculation | SUPERQUAD |

Experimental parameters for the spectrophotometeric study of PEA and its complexation to copper(II) are summarised in Table 2.

| **Table 2** Summary of experimental parameters for the spectrophotometric study of the Cu(II)/PEA system | | | |  |  |
| --- | --- | --- | --- | --- | --- |
| Solution composition | | | |
| [*T*L] range/mol dm-3 | |  | 1.5 x 10-3 - 1.2 x 10-3 | |
| [*T*Cu] range/mol dm-3 | | 2.7 x 10-3 -1.1 x 10-3 | |
| *I*/mol dm-3, electrolyte | | 0.1, KCl | |
| pH Range | | 3 - 10.5 | |
| Experimental method | | Spectrophotometric Titration (400-900nm) | |
| *T*/°C | | 25 ± 0.1 | |
| Total number of data points | | | |
| Copper complexation |  | 2x[spectra at 28 H+ concentrations 26 wavelengths] = 1456 points | | |
| Method of Calculation | | | HYPERQUAD |

Crystalographic Experimental

(by least-squares refinement on diffractometer angles for 25 automatically centred reflections, in the range 19.4 < 2 < 24.9° ,  **=** 0.71069 Å), *Dc* = 1.391 g cm-3, *F*(000) = 6978. Blue block crystal. Approximate crystal dimensions 0.50 x 0.40 x 0.35 mm,

**Data collection and processing.** Rigaku AFC7S diffractometer with graphite monochromated MoK radiation; Decay correction (8.26% decline), and absorption correction (trans. factors: 0.5476 and 0.6458) were required. Corrections were made for Lorentz and polarisation effects.


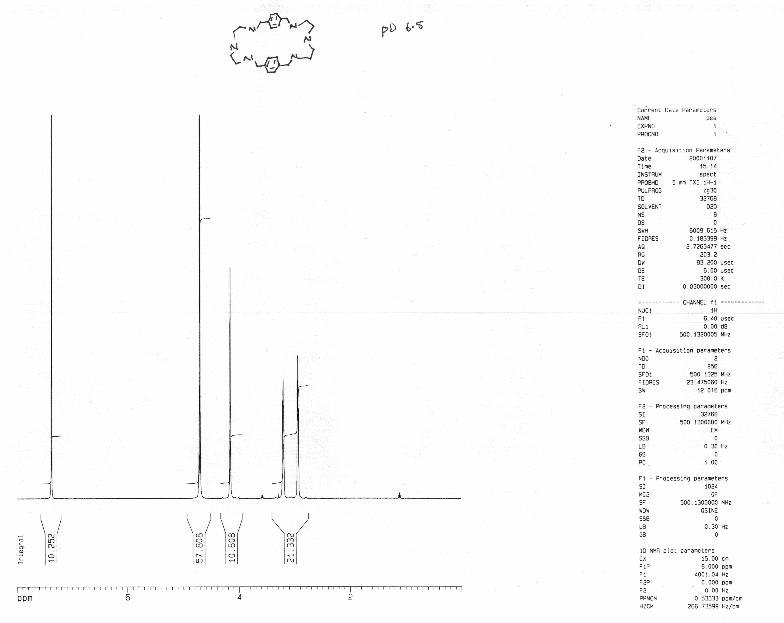


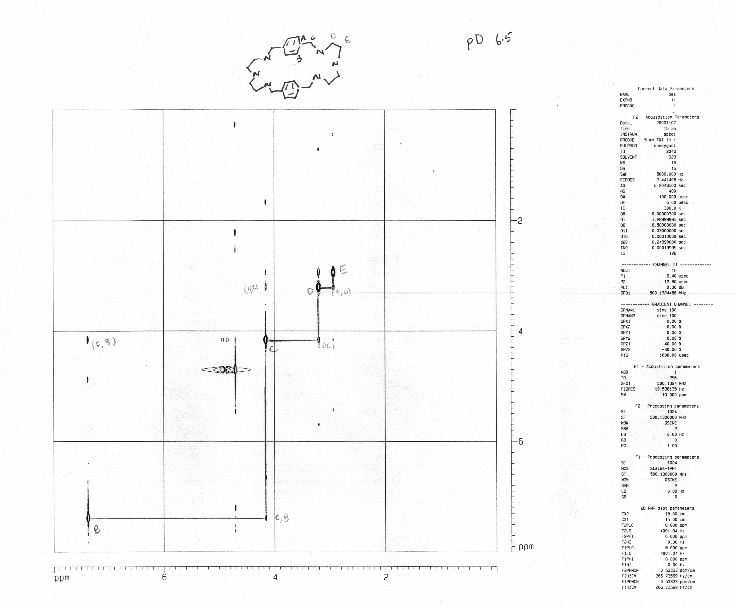


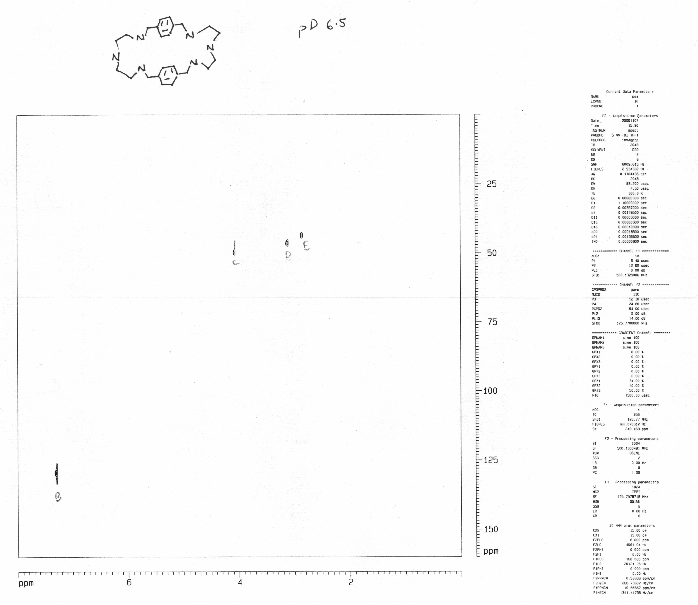

Supplement: b006199i.doc [file b006199i.doc]
